# Supplementary material for: Strengthening national public health institutes: a systematic review on institution building in the public sector
Source: Front Public Health. 2023 May 18;11:1146655. doi: 10.3389/fpubh.2023.1146655 (PMC10232799; doi:10.3389/fpubh.2023.1146655)
Supplement: Supplementary file 2 [file Data_Sheet_2.xlsx]

## Sheet: Tabelle1
Author (s)	Reference Nr	Title	Year of publication	Country / Region / Setting (if applicable)	Main afiliation / Main donor (if applicable)	Type of document	Study design (if applicable)	Purpose / Aim of the document	Field of Institution-building and/or Name of Institution	Level of intervention related to Institution-Building	Main outcome of interest	Main outcome of interst code: 1) Theories and concepts 2) Frameworks and guidelines 3) Empirical evidence	Domain 1: Governance	Domain 2: Knowledge and innovation	Domain 3:Inter-institutional cooperation	Domain 4: Monitoring and Control	Domain 5: Participation	Domain 6: Sustainability and context specific adaptability
Abdellatif, Lobna Mohamed and Atlam, Baher Mohamed	66	Public management institutions` alignment: the case of Egypt	2018	Egypt	n	Journal article / Peer-reviewed	Other: Analytical Framework	to show the aligned development that took place in public administration and public financial management toward serving public values	n	National	Framework	2	Changes in the ways a public institution should be managed - Development of administrative and budgetary institutions NPM (New Public Management) As per NPFM, five main domains of reform were indicated: (1) changes to financial reporting: hold the adherence to accrual accounting and the international accounting standards; (2) enhancing marketing philosophy (3) advocating performance management ; …	n	n	Control and discipline: Get the basics right by controlling transactions and inputs. Maintaining trust and legitimacy of the system. Budgeting for creating public values through enhancing management values of transparency and accountability. Value creation through integrated public administration value based system that interacts in the course of a network of government relationships. Focus is on…	Participation and representation are central for public organizations to become autonomous responsive decision-makers.	n
Abdullahi, Danjuma; Baba, Yahaya T.; and Musa, Aminu	79	Building innovative public institution	2016	n	n	Journal article / Peer-reviewed	Mixed methods study	Public service innovation. Most of the problems of public organisations are associated with a lack of innovation. The paper also touches on the reasons why public institutions are less innovative compared to the private counterparts as well as characteristics of some successful public service institutions	n	n	Framework	2	Leadership: The leadership challenge involving staff is to convince dispirited people that change is possible and that their efforts to do better will be supported. Many turnarounds involve reengineering the basic processes of the organisation, for example replacing a centralised functional structure with geographically decentralised structures that give front-line workers more autonomy but also …	Public-service institutions need to be innovative. Digital government: Digital management of records will enable institution to make the best use of new technologies and innovative ways of doing business. It will enable organisation to implement the government's information reforms more efficiently and effectively. The essence of digital government is to save cost and ensure transparency.	Public organisations must assume their role in society by engaging with various stakeholders, institutions, and their respective communities. In order to meet its expectations, organisations must carefully select and identify the right partners to tailor its services.	One of the effective ways of controlling corruption is to make it hard for people to steal. Innovative mechanism of minimising corruption is provision of incentive to the employees, experiences of China and some East Asian countries has proved that motivating employees plays a vital role in reducing corruption. Other measures are building democratic governance base on decentralisation that allows…	n	n
African Union and Africa Centre for Disease Control (Africa CDC)	22	Framework for Development of National Public Health Institutes in Africa	2019	Africa	African Union / Africa CDC	Gray Literature	Descriptive Analysis	describes National Public Health Institutes including aspects of their operations, their public health functions, and considerations in creating or strengthening NPHIs	Health	Regional (Inter-country)	Framework	2	Aspects necessary for a good functioning organisation - Strong and continuously improving NPHI workforce; Adequate infrastructure to perform the core functions efficiently; Information technology (IT) Key for successful NPHI creation is having a shared vision and a plan for achieving it, and clear core functions. Political will is an essential key to success. Legal: Clearly defined legal authorit…	NPHIs should emphasize the use of data and evidence Work with the Ministry of Health and internal and external partners to identify the highest priority research questions and ensure these are addressed. Conduct monitoring and evaluation projects and research to identify ways to improve the public health system. Ensure research results inform policy development, program decisions, resource priori…	Often research priorities are determined by donor interests and the availability of funds, leaving many critical questions unanswered. The NPHI should define the research needed to answer questions critical to improving the country´s public health and work to ensure these research needs are addressed. Sources of funding :Partnerships and donor relationships also need to be cultivated. Linkages at…	Transparent and accountable: NPHIs must be able to manage and account for resources using good business practices.	Communication and social mobilization are approaches to engaging civil society in helping the NPHI achieve its goals. This includes: Develop material and resources specifically for use by community organizations and other civil society groups. Solicit civil society input into programs and policies. Develop messages based on target audiences, using a variety of media for the greatest reach. Build …	Sustainability: Plans for sustainability: NPHIs may use numerous strategies to address sustainability, including working through the government appropriations processes, garnering support from partners, developing capacities to obtain research grant funding, and creating foundations that can accept resources from a range of sources.
Alam, Asad; Mokate, Renosi; and Plangemann, Kathrin A	31	Making It Happen - Selected Case Studies of Institutional Reforms in South Africa	2016	South Africa	World Bank Group	Gray Literature	Descriptive Analysis	to cross-fertilize knowledge under the South Africa Knowledge Hub program by "exporting" South African success stories to other countries. It may also rekindle the spirit of change within South Africa, informing the national debate on many other economic and social challenges.	n	National	Case study	3	Transformational Leadership. Leadership came from all levels, with a strong emphasis on consensual and collective decision making. Leaders were able to tap into popular support for transformational change, but they also had to respond to the sense of urgency. Urgency meant that leadership was flexible, with pragmatism often prevailing over ideology to ensure both quick wins and mid- and long-term…	Innovating with the support of new regulations and laws, professionalization of staff, modern service delivery systems, information technology have enhanced the quality of services, slashed waiting times, and reduced fraud and corruption Adopting Pragmatic, Flexible, and Innovative Approaches. Most reforms adopted an approach of experimenting and innovating, learning from successes and failures, …	Learning from International Experiences. The need to find solutions led South African practitioners to use evidence-based approaches and look to international good practices as part of an evidence-based analysis of options to address each of the key policy challenges.	Increasing Budget Transparency. The performance-based budgeting process, including citizen access to budget information, is a salient feature of the focus on incorporating a performance orientation across sectors in South Africa. Strengthening Performance Monitoring and Evaluation: laying the foundation for improved government coordination, budget efficiency and effectiveness, and greater transpa…	Civic engagement and consultation have been hall-marks of successful reforms to build consensus, which some observers have called "policy development under the public gaze" The inclusiveness of processes and the adoption of different participatory approaches "from constitution making to budget transparency to the development of biodiversity frameworks" is a common feature of the institutional de…	n
Aluttis, Christoph; den Broucke, Stephan Van; Chiotan,Cristina ; Costongs; Caroline; Michelsen, Kai; and Brand, Helmut	46	Public health and health promotion capacity at national and regional level: a review of conceptual frameworks	2014	Europe	n	Journal article / Peer-reviewed	Policy analysis	Review of currently existing frameworks, which describe public health capacities at the national or regional level. The main objective is to highlight commonalities among these frameworks and propose a country-level framework which integrates all reoccurring dimensions.	Public Health	n	Framework	2	Public Health Capacities - components related Leadership and governance: -Responsibilities for public health -Policy making for public health -Expertise within Ministry of health -Leadership qualities in the public health sector	Public Health Capacities - components related: Knowledge development -Health information and monitoring systems -Public Health reporting -Research and knowledge infrastructures Workforce: -Human resources -Training and development -Public Health competencies -Professional associations	Public Health Capacities - components related: Partnerships -Formal and informal partnerships -Joined-up government	n	n	Context evaluation/relevance. All the PH capacities depend on country specific context with relevance for public health Organisational structures: -Institutional capacity for public health. -Program delivery structures. -Public Health aspects of healthcare services -Capacity to respond to emergercies.
Barma, Naazneen H. Elisabeth Huybens, Lorena Viñuela	5	Institutions Taking Root - Building State Capacity in Challenging Contexts	2014	Fragile setting (Gambia, Laos, Sierra Leone, Timor-Leste)	World Bank	Gray Literature	Case studies	Analyse "how nine selected institutions across four fragile and conflict-affected countries have managed to improve their capacity in very challenging environments"	Public sector	n	Case study	3	Institutions managed to achieve results and expanded the scope and coverage of services by using a repertoire of organization tools, including: 1) strategic choices, 2) adaptation of administrative architecture, 3) management of people (senior and new employees) 4) building of organizational identity 5) leadership beyond individuals 6)learning and self-evaluation	n	Positive cycles: Elites may support the strengthening of institutions due to the need for donor resources. With the support of elites, "roadblocks" of implementation can be removed, and results may generate legitimacy for internal and external audiences. Reforms and results can turn the agency/institution into an attractive partner for development and bilateral cooperation. These processes may cr…	Transparency and auditing with clients participation increase legitimacy and society support	Relationships with clients and other stakeholders (e.g. consultative mechanisms) increase accountability and recognition among society with consequently support	Three core sets of outcomes to evaluate if an institution is successful: results (sustained and measurable improvements); legitimacy (population`s sentiment regarding the agency`s performance); and durability (resilient institution, enhancing results over time, even if in case of leadership changes or external shocks).
Barzilay, Ezra J.; Vandi, Henri; Binder, Sue; Udo, Ifeyinwa; Ospina, Martha L.; Ihekweazu, Chikwe; Bratton, Shelly	32	Use of the Staged Development Tool for Assessing, Planning, and Measuring Progress in the Development of National Public Health Institutes	2019	Colombia, Nigeria	US Center for Disease Control and Prevention; International Association of Public Health Institutes, Colombian National Institute of Health; Nigerian Centre for Disease Control	Journal article / Peer-reviewed	Case studies	The paper discusses the current use of the SDT (stage development tool) by NPHIs to establish baseline capacity and inform strategic planning, and its proposed use in a three-step sequence for measuring the impact of capacity-building interventions over time.	Public Health	National	Case study	3	Carry out discussions to evaluate the organisation based on the "internal-facing" and "external-facing" topics . Based on these discussions, define a clear work plan to address the priority gaps, including the actions to be taken, personnel responsible for each activity, deliverables, and timeframe within which the actions will be taken.	n	n			n
Binder, Sue Lola E. Adigun and Allison L. Greenspan	23	NPHI Creation: Lessons Learned and FutureDirections	2008	Canada, Marroco, Nigeria, South Africa, USA	IANPHI	Journal article / Peer-reviewed	Commentary (based on evidence of five countries)	We provided results of a survey of IANPHI members in an earlier issue of this Journal. We also studied NPHIs to understand how they had been created -why are NPHIs formed, key ingredients in their successes, and barriers to greater impact.	Public Health	National	Case study - commentary	4	Leadership; as described in the interviews; included a clear vision; ability to motivate staff; ability to articulate a vision for higher-level Leadership; ability to be opportunistic; and effectiveness in dealing with controversies and difficult situations.	The five NPHI directors mentioned the importance of trained personnel and investment in staff growth and development. Even less-resourced NPHIs, like Nigeria`s, invest in staff training, where staff are encouraged to earn graduate degrees and to focus their dissertations on priority topics for Nigeria's NPHI. They can continue to receive their salaries while completing their degree requirements.	n	Engagement with stakeholders improve quality of monitoring	Engagement with stakeholders improve quality of monitoring	n
Bloom, Gerald	61	Building institutions for an effective health system: lessons from China's experience with rural health reform	2011	China	n	Journal article / Peer-reviewed	Case study	This paper is concerned with the management of health system changes aimed at substantially increasing access to safe and effective health services. It argues that an effective health sector relies on trust-based relationships between users, providers and funders of health services, and that one of the major challenges governments face is to construct institutional arrangements within which these…	Health	National	Case study	3	It is widely agreed that the state has a key role to play in building institutions to order health-related markets. However, the creation of the capacity to enforce regulations is a major undertaking (Ensor and Weinzierl 2006). There has been an increasing reliance on a variety of regulatory partnerships (Peters and Muraleedharan 2008).	n	Regulation, partnerships and stewardship: There has been an increasing reliance on a variety of regulatory partnerships. The emergence of regulatory partnerships demonstrates the need to build institutional arrangements to support new kinds of relationship between health sector actors. However, it raises important questions concerning the management of conflicting interests and the protection of …	n	n	Historical aspects (post-colonial and/or post-revolutionary) create challenges for the construction of an effective health sectot, need to adapt the narative and organise public consultations; new definitions of of roles and responsabilities.
Bloom, Gerald; and Wolcott, Sara	83	Building institutions for health and health systems in contexts of rapid change	2013	n	Institute of Development Studies, University of Sussex, Brighton, East Sussex, BN1 9RE, United Kingdom	Journal article / Peer-reviewed	Review article	The aims of this paper are to increase understanding of the management of health system development in dynamic and complex contexts and to identify key knowledge needs of participants in change processes.	Health	n	Framework	2	Understanding of health system stewardship and change management. This kind of understanding is particularly important during a potentially significant transition, when the choice of a development pathway can influence health system development for a very long time. An analysis of governance arrangements that influence health system performance. These cover all aspects of the construction and coo…	Generation of systematic knowledge about the functioning of the health system. This includes the inter-relationship between contextual factors and the behaviour of health sector actors. Some of the literature on change management in complex contexts suggests that experimental interventions provide an important source of this kind of knowledge, especially if evaluations look at the factors influen…	Share of resources, expertise, behavioral norms, core ethical values, and effective governance influencing health system performance	n	n	Importance of the creation of an understanding of the historical legacy of the health sector in a particular country or locality. The formation of institutions is a context-specific, historically informed, process. The outcome of an intervention is likely to be strongly influenced by the historical legacy. Notable how few countries use a systematic knowledge of their historical legacy as a basis …
Boyd, Neil M.	56	Helping Organizations Help Others:Organization Development as a Facilitator of Social Change	2011	United States	Department of Business Administration, Lycoming College, Williamsport, Pennsylvania, USA	Journal article / Peer-reviewed	Cross sectional study	The present study attempted to quantitatively investigate if organization development interventions increase the likelihood that public organizations will deliver better social outcomes for the constituents they serve.	n	District	Empirical evidence - cross sectional study	3	Teamwork significantly predicts customer service utcomes; internal agency changes significantly predict customer service outcomes	An Outlook for Change & Innovation, and training significantly predicts customer service outcomes	n	n	Climate of participation in Decision Making and individual participation significantly predicts Customer Service outcomes	Historical and administrative context affects the development of organizations, and sustainability depends on the capacity or organisations to make adjustments. Consider interventions as a vehicle to improve social lives and serve the community
Bridges, Kate; and Woolcock, Michael	33	How (Not) to Fix Problems That Matter - Assessing and Responding to Malawi's History of Institutional Reform	2017	Malawi	World Bank Group	Gray Literature	n	n	n	n	Case study - Evaluation	3	Institutional reform need to focus on solving problems rather than selling solutions. If reformers begin with a specific, functional problem and ensure that implementation progress is assessed not against indicators of a change in form, but against the core problem being fixed, then functional success is far more likely.	n	Critics on donor-driven agenda, and the transfer of "best practices" without considering the context		n	Often, reformers take a commonly used, highly designed and engineered best practice solution and transfer it to Malawi, hoping it will work here as it has in other countries. Analysis shows that it seldom does. The rules (informal and formal, legislative and cultural) that already exist will either support or undermine the success of any new rules that one attempts to overlay. If the solution is …
Buntaine, Mark T. Bradley C.Parks, Benjamin P. Buch	84	Aiming at the Wrong Targets: The Domestic Consequences ofInternational Efforts to Build Institutions	2017	n	n	Journal article / Peer-reviewed	Quantitative Descriptive	To explain why international development organizations have had so little success building and reforming public sector institutions in developing countries.	World Bank	n	Framework	2	Institutions using a repertoire of organization tools, including: 1) strategic choices, 2) adaptation of administrative architecture, 3) management of people (senior and new employees) 4) building of organizational identity 5) leadership beyond individuals	n	International organizations set in motion signaling pressures that drive domestic action. International development organizations have devoted an extraordinary amount of time, energy, and funding to “capacity building” and “institutional strengthening” activities in developing countries. Yet the best available evidence suggests that externally sponsored programs of this type usually fail. Many co…	n	n	Importance to consider local context and adapt initiatives
Clement, Sarah; Moore, Susan A.; Lockwood, Michael; and Mitchell, Michael	34	Using Insights from Pragmatism to Develop Reforms That Strengthen Institutional Competence for Conserving Biodiversity	2015	Australia	This research is an output from the Landscapes and Policy Research Hub. The hub is supported through funding from the Australian Government's National Environmental Research Program and involves researchers from the University of Tasmania (UTAS), The Australian National University(ANU), Murdoch University, the Antarctic Climate and Ecosystems Cooperative Research Centre (ACECRC), Griffith Univers…	Journal article / Peer-reviewed	Descriptive Analysis	This paper demonstrates how insights from pragmatism can inform an approach for designing institutional reforms that address current shortcomings in adaptive governance approaches.	biodiversity institutions	Regional (Inter-country)	Framework	2	Governance reform is needed to effectively address the causes of biodiversity decline. In making a strategic plan, consider the options "(1) identifying the reform space and requirements bounding the extent of reform possibilities; (2) developing a reform map depicting the range of possibilities within this space; and (3) selecting and developing two reform options for each case study from the ra…	n	n	n	n	n
Cole, Daniel H.; and McGinnis, Michael D.	75	Elinor Ostrom and the Bloomington School of Political Economy	2017	n	n	Other: book	Policy analysis	Explores the historical development of IAD (Institutional Analysis and Development) framework, illustrate its application to specifi c policy problems, and highlight recent extensions that ensure it will remain a vibrant focus of research for years to come.	n	n	Framework	2	The IAD framework was built to serve as a foundation for the kinds of institutional analysis needed to understand and nurture the diverse forms of creative public entrepreneurship that are so critical to the long-term sustainability of democratic self-governance. Institutions can and should be build by design, not as a subject of accidents.	n	n	n	n	n
De Bruyn, Tom	35	Analysing South-South Capacity Building. Comparing Six Flagship Projects of Brazil, India and China in Mozambique	2019	Mozambique, (support from Brazil, India, China)	Government of Flanders	Journal article / Peer-reviewed	Case Study	This article analyses and compares the capacity building strategies of three of the main protagonists of South-south Development Cooperation (India, Brazil and China). A critical case study approach is used in which six flagship projects in the health sector in Mozambique are examined.	South-South Development Cooperation (SSDC)	National	Case-study - Evaluation	3	n	n	The studied cases - support of Brazil, India, China to Mozambique - focus on peer-to-peer cooperation and common ground and experience. Still, SSDC`s actors have different approaches and development models. Importance to address institutional and policy environment for success.		n	n
Desai, Uday and Keith Snavely	47	Technical assistance for institutional capacity building: the transferability of administrative structures and practices	2007	USA, Russia, Bulgaria	South Illinois University	Journal article / Peer-reviewed	Case description	In this article we suggest that there are somefundamental constraints inherent in the framework of cross-national transfers. Itidentifies two major transferability challenges: (1) feasibility of transfer and (2) appropriateness of transfer. This article discusses three institution building programs of short duration (three to five years), whose broad purposes were institutional and professional c…	Public sector training, education sector	National	Concepts review	1	In each of the three projects strong partner leadership was essential. The US government has been actively engaged for the last 15 years in foreign assistance programs for building democratic governance institutions and enhancing overall government capacity in the former Soviet bloc countries.	Learning from the experiences of others, near and far, as well from one's own past is not uncommon. Critical issues in learning from one's own past or from the experiences of the other countries are not whether we can learn anything from elsewhere,but when, where and how we learn	International cooperation projects, support by the US State Department, transfer administrative structure and management practices. There are funtdamental constraints on transferability of knowledge and soft technology to build institutional capacity in the host country. 1) "constraints of transferability" - transfer attept is affected by the "assumption of superiority of the donor country´s inst…	Institutional transfer programs apply ultimate goals for building democratic institutions and enhancing quality of life for citizens. Importance of measurement of long-term outcomes: longitudinal studies, follow-up projects and studies after 10 years or more. Difficulties to separete other enironmental effects as other changes in institutions.	Institutional partners and individual participants will understandably be motivated by a project that offers them clear benefits.	While fundamental questions about the transferability of institutional norms and structures from one country to another remain, the study indicate that thoughtful and flexible implementation strategies will likely increase the chances that soft technology transfer projects will contribute to building institutional capacity. Recognize and be an open about challenges in transferability (different a…
Edelstein, Michael; Lee, Lisa M.; Herten-Crabb, Asha; Heymann, David L.; and Harper, David R.	70	Strengthening gloal public health surveillance through Data and Benefit Sharing	2018	n	n	Journal article / Peer-reviewed	Policy analysis	n	global public health surveillance	n	Concepts review	1	The public health surveillance landscape is complex, with a range of government and nongovernment stakeholders who can provide and receive data as well as facilitate sharing	Data sharing improve the capacity of disease detection and the capacities of the organisations involved.	n	n	n	n
Eriksen, Svein	48	Institution Building in Central and Eastern Europe: Foreign Influences and Domestic Responses	2007	Central and Eastern Europe	n	Journal article / Peer-reviewed	n	In this article, the author discusses how and to what extent external influences (i.e., actors, resources, norms and administrative models) have affected institutional reform in Central and Eastern Europe, a region that for centuries has been dominated by foreign powers.	Institution Building in Central and Eastern Europe	National	Concepts review	1	Political leadership is essential to achieve successful reforms in transition countries and conversely, insufficient political demand for institutions or institutional reform is the single most important obstacle to institutional development in poor countries. The article demonstrates: (a) how three aspects of governments of the so-called transition countries - administrative and cultural traditi…	n	Policies are transferred across nations and cultures in a number of ways and the effect of external involvement may depend on the modalities of transfer. When adapting to foreign models or international trends, local actors tend to be oriented towards the preexisting repertoire of organizational and decisionmaking patterns. There is an external actor defining and enforcing institutional agendas f…	n	n	Importance of context, adjustments and flexible approaches considering the East European culture
Erondu , Ngozi A; Rahman-Shepherd, Afifah; Khan, Mishal S; Abate, Ebba; Agogo, Emmanuel; Belfroid, Evelien; Dar, Osman; Fehr, Angela; Hollmann, Lara; Ihekweazu, Chikwe; Ikram, Aamer; Iversen, Bjorn Gunnar; Mirkuzie, Alemnesh H; Rathore, Tayyab Razi; Squires, Neil; and Okereke, Ebere	36	Improving National Intelligence for Public Health Preparedness: a methodological approach to finding local multi-sector indicators for health security	2021	Ethiopia, Nigeria, Pakistan	Public Health England, others	Journal article / Peer-reviewed	Quantitative Descriptive	Description of the design and implementation a process, in collaboration with three National Public Health Institutes (NPHIs) in Ethiopia, Nigeria and Pakistan, to identify potential preparedness indicators that exist in a myriad of frameworks and tools in varying local institutions.	NPHIs	National	Evaluation	3	n	Collecting and collating local sources of information may prove essential to addressing gaps; it is a necessary step towards improving preparedness and strengthening international health regulations compliance.	n	A wealth of data is routinely collected across a range of indicators and using various monitoring and evaluation tools and programmes. These data are not readily accessible and the mechanisms to understand and effectively analyse and use the data in decision-making for national health security and preparedness are lacking.	n	n
Essink, Dirk R.; Ratsavongb, Kethmany; Ballya, Esmee; Frasera, Jessica; Xaypadithc, Sengdavy; Vonglokhamb, Manithong; Ew Broersea, Jacqueline; and Kounnavong, Sengchanh	62	Developing a national health research agenda for Lao PDR: prioritising the research needs of stakeholders	2020	Lao PDR	financially supported by the EU funded LEARN program coordinated by the MCNV-Laos	Journal article / Peer-reviewed	Mixed methods study	The objective of this capacity building and practice-oriented study is to describe the process and outcome of the first National Health Research Agenda for Lao PDR and how the agenda contributes to institutional capacity of the Ministry of Health, in order to contribute to evidence-informed public health policy making.	n	National and subnational	Evaluation	3	n	Prioritization of research agenda improved the institutional capacity of the Ministry of Health	n	Use of technology can improve transparancy	Findings reveal that health policymakers and practitioners within the country prioritised research on health-seeking behaviour, followed by research to improve the health information system.	n
Gagnon, Stéphanie; and Seguin, Francine	57	Institution and Change: Possible Coexistence	2010	Canada	n	Journal article / Peer-reviewed	Case study	Health care - changes and endurance of an institution regarding environmental changes	n	National	Case study	3		n	n	n	n	Considering changes in the enviroment, an institition may change based on: Firstly, through a specific pattern, the social worlds (in the hospital) are mobilized according to their relative importance. Secondly, the organizational actors must draw upon their strategic and professional competence to make changes compatible with the values embodied within their institution.
González-Block, Miguel Angel	65	Leadership, institution building and pay-back of health systems research in Mexico	2009	Mexico	n	Journal article / Peer-reviewed	Policy analysis	Analyses the development of health systems research in Mexico from a long-term perspective and at the macro-institutional level	n	National	Case study	3	n	Investments in health systems research in Mexico at least since the second wave of health reforms in the mid-eighties contributed to the reach and credibility of health policies and programs in Mexico and internationally. Decision-makers are demanding research at all levels and are ready to invest increasing resources to obtain critical feedback on their policies and programs. Health systems rese…	Private Sector: Several of the most enlightened business leaders were persuaded to endow in 1985 the Mexican Health Foundation (Funsalud) as an evidence-based policy formulation think-tank and a stronghold to support health research capacity building. FUNSALUD went on to promote strategic alliances for policy dialogue and development with academic institutions, the private sector, government, int…	n	n	n
Grajzl, Peter; and Murrell, Peter	86	Fostering civil society to build institutions	2009	n	Department of Economics, Central European University, Nador, Budapest, Hungary; Department of Economics, IRIS Center, University of Maryland, College Park, Maryland, USA	Journal article / Peer-reviewed	Quantitative descriptive (Modelling study)	Investigate the effects of civil society participation in the institution-building processes	n	n	Ev - Other - modelling	4	n	n	Role of foreign aid supporting civil society participation (to strengthen institutions). Foreign aid only works if channelled selectively.	n	The literature presents almost universal agreement that civil society participation has a beneficial role in institution building. The authors developed a mathematical model to investigate if this assumption is correct, considering aspects of reform programs, interest groups and politicians, social welfare and politicians' objectives, and politicians and civil society, and timeline of processes. …	n
Hudalah, Dellik; Firman, Tommy; and Woltjer; Johan	63	Cultural Cooperation, Institution Building and Metropolitan Governancein Decentralizing Indonesia	2017	Indonesien	n	Journal article / Peer-reviewed	Case study	The main aim of this article is to explain the role of culture in metropolitan institution building.	n	National	Case study	3	n	n	Cooperation between organisations with similar functions and mandates are beneficial	n	n	Use of cultural tradition/costumes adapted a strategies that improved the function of an institution. We can learn from the case study that integrating culture into modern, democratic anddecentralized state structures can be far from oppressive, being mutually reinforcinginstead. In fact, it encourages learning processes to happen and thus enables innovativeand adaptive metropolitan governance mo…
Ihekweazu, Chikwe; Ncube, Fortune; Schoub, Barry; Blumber, Lucille; Ruggles, Ruth; Salter, mark; Madhi, Shabir; and Kessel, Anthony	37	A North/South collaboration between two national public health institutes - A model for global health protection	2015	England and South Africa	Public Health England and National Institute for Communicable Diseases	Journal article / Peer-reviewed	n	Description of a bilateral between two public health institutes with similar mandates.	Health	Regional (Inter-country)	Case study	3	n	Cooperation between two like-minded organisations facilitated the exchane of information and development of scientific knowledge in new and reemerging diseases	The collaboration between two National Public Health Institutes (UK and South-Africa) has led not only to important public health results for both countries, but also facilitated the exchange of public health expertise and information. T Factors that contributed to a successful collaboration included: A steering committee of senior staff members of both organisations assured quick resolution of …	n	n	n
Jakab, Zsuzsanna; Selbie, Duncan; Squires, Neil; Mustafa, Saqif ; and Saika, Sohelt	14	Building the evidence base for global health policy: the need to strengthen institutional networks, geographical representation and global collaboration	2021	n	n	Journal article / Peer-reviewed	Analysis paper	Description of experiences and perspectives from the WHO and International Association of National Public Health Institutes including the ongoing pandemic and work conducted in the UK-WHO 'Tackling Deadly Diseases in Africa Programme'.	Health	n	Concepts review	1	Strong NPHIs and WCCs allow countries to take an evidence-based approach to policy-making. They enable countries to set, implement and address national public health priorities within and outside the traditional health sector.		The balance of responsibilities between different actors in the public health system face significant change as each nation reflects on its COVID-19 response. Resource-rich NPHIs, such as the Robert Koch Institute in Germany, Fiocruz in Brazil and Public Health England, have expertise in delivering the essential public health functions (EPHFs) as well as in international collaboration for capacit…		n	COVID-19 has exposed the myth that any one country has all the solutions to tackle global health challenges. It has confirmed the need to give a greater, more equitable voice to the global south and to better harness networks for multi-directional learning. An (new) region-wide health crisis response plan was drawn up taking a health systems-wide approach and seeking to tackle problems at the com…
Johnstone, Paul W.; Eder, Marcus K.; Newton, Autilia; Bentley, NeilJakab, Zsuzsanna; Selbie, Duncan; Squires, Neil; Mustafa, Saqif ; and Saika, Sohelt; and Rufus, Ian	38	The West African Ebola emergency and reconstruction; lessons from Public Health England	2019	West Africa: Libera, Guinea, Sierra Leone	Public Health England	Journal article / Peer-reviewed	Case study	The article describes the role PHE played as a national public health agency supporting reconstruction and long-term development through the UK Government (Department for InternationalDevelopment) programme called "Resilient Zero"	Health	Regional (Inter-country)	Case study	3	n		Model of international aid which uses national and international co-operation to strengthen and develop local structures and services, to better address longer term needs, while strengthening the capacity of the country to face future emergencies. Assistance from the International Association of Public Health Institutes (IANPHI), and using experience, PHE (Public Health England) has supported the…	n	n	n
Khan, Mishal S Osman Dar, Ngozi A Erondu, Afifah Rahman-Shepherd, Lara Hollmann, Chikwe Ihekweazu, Okechukwu Ukandu, Emmanuel Agogo, Aamer Ikram, Tayyab Razi Rathore, Ebere Okereke, Neil Squires	39	Using critical information to strengthen pandemic preparedness: the role of national public health agencies	2020	Ethiopia, Nigeria and Pakistan	Global Health Programme, Chatham House, London, UK; Department of Global Health and Development, London School of Hygiene and Tropical Medicine, London, UK; Public Health England, London, UK; Nigeria Centre for Disease Control, Abuja, Nigeria; National Institute of Health, Islamabad, Pakistan	Journal article / Peer-reviewed	n	n	Public Health	Regional (Inter-country)	Concepts review	1	n		Data sharing between National Public Health Institutions as a component to strengthen organisations and functions - Data sharing with NPHIS as a critical element of preparedness. Effective access to, and use of, data by NPHIs is a critical building block of preparedness. There are significant challenges to overcome for NPHIs to have timely access to data that they do not own. On a technical level…	Strengthening national accountability for preparedness for global health security at the national level requires the clear allocation of a mandate for the role and appropriate institutional links and authority of NPHIs to collect and collate the relevant information to inform preparedness assessment. While the IHR and Joint External Evaluation (JEE) process provide a robust framework for assessin…	n	n
Lejano, Raul	71	The Phenomenon of Collective Action: Modeling Institutions as Structures of Care	2006	n	n	Journal article / Peer-reviewed	n	Development of a theory of how institutions can work through the web of social relationships that exist in a place rather than through formal, bureaucratic lines of authority.	Health	n	Theory	1	Proposition 1: Institutions result from the working and reworking of relationships between policy actors rather than from direct design. This means that functions, services, and projects are coursed through the existing web of relationships rather than formal bureaucratic (or other) lines of authority . Structures of (health) care are done by routing them through the web of relationships that exi…	n	Institutions are maintained by the constant working and reworking of relationships. Failure to nurture these relationships can cause the institution to falter. If institutions are worked through a system of relationships, then to keep these institutions viable, we need to respect and nurture the system of relationships. We should not simply impose a formal institutional design on a place without …	n	n	n
Lejars, M.	59	Le Système de Santè en Afghanistan: Difficultés et perspectives Institutionnelles [Health system in Afghanistan: problems and institutional perspectives]	2008	Afghanistan	n	Journal article / Peer-reviewed	n	n	Public Health	National	Case study	3	Seven components at the level of three branches (Health Policy and Planning, Curative and Diagnostic Services, and General Administration). 1. Support for health policy development and planning 2. Support for the implementation of health service financing. 3. Support for monitoring and evaluation to improve health information. 4. Strengthened administration, management and procurement 5. Support …	n	Implementation of Management Unit (Reform Implementation Management Unit RIMU) under supervision of Public Service Comission, was set up in 2007 with the financing of European Union aiming to improve human resources management, recruiting, promotion based on merit and performance, and training.	n	n	n
Lenz, Tobias	49	Interorganizational Diffusion in International Relations	2021	European Union	Oxford University Press	Gray Literature	Descriptive Analysis	This book addresses these questions by developing a diffusion account of the influence of the EU that explicates its pathways and specifies the scope condition for their operation. It demonstrates that EU influence systematically shapes processes of regional institution building elsewhere, but that such influence varies across different types of regional organizations	n	n	Case studies	3	n	n	Policy-makers in Europe have over time built unprecedented supranational institutions´ commission with far-reaching rights in terms of structuring decision-making among member-state governments; a directly elected parliament that (co-)legislates; a European Court of Justice with features akin to powerful national courts; as well as a series of advisory bodies that institutionalize participation i…	n	n	n
Leovaridis, Cristina; and Popescu, Gabriela	50	Organizational Innovation - Means to Enhance Quality of Life for Employees in Knowledge Economy	2015	Europe	n	Journal article / Peer-reviewed	Other: Secondary data analysis: The main question of this study is exploring how firms manage knowledge in the context of networked innovation	Overview of the latest significant researches, both in academic and public institutions, both theoretical and empirical, both in Europe and worldwide, on organizational innovation.	n	n	Concepts review	1	n	Knowledge-based organizations are built on intangible assets, on the knowledge, experience and competences of high-skilled human resources, who represent the most valuable resource of these organizations. The collaboration and interaction processes within networked innovation - rather than simply the formation of innovation networks - were found to play a crucial role. Two basic collaboration mod…	n	n	n	n
Lopert, Ruth; Ruiz, Francis; Chalkidou, Kalipso; Chanturidze, Tata; Gheorghe, Adrian; Bejan, Alexandra; and Patel, Reetan	51	Technical Assistance for institution building of Health Technology Assessment structure, including training for the National Agency for Medicines & Medical Devices	2017	Romania (Case study: other countries)	n	Gray Literature	Descriptive Analysis	n	n	n	Framework	2	For the development of organisations, plans should be made considering the activities: ·Completing the description of the organisational structure,identifying key roles and responsibilities; ·Specifying high level governance arrangements and define necessary regulatory reforms to give effect to these; ·Articulating a process map and establish operating procedures and timelines;·Establishing key p…	n	n	External evaluation groups (EGs) The external evaluation groups should be legally independent and, in their capacity, perform independent analysis of the evidence on behalf of the MoH/NAMMD. The evaluation reports prepared by external evaluation groups synthesize, critique and represent the evidence to inform the EGs deliberations. Particular attention should be paid to specifying the need for en…	n	n
Mahoui, Karim; and Ferfera, Mohamed Yassine	72	Analyse des modes de coordniation inter-organisationelle cas des relations inter-entreprises et entreprises-institutions publiques Analysis of Interorganizational Coordination in the case of inter-company and company-public institution relations	2013	n	n	Journal article / Peer-reviewed	Other: multi disciplinary approach	To contribute to the understanding of inter-organisational coordination by highlighting four main dimensions: the context or environment, the nature of the coordination links, organisational behaviour and modes of regulation.	inter-company and company public	n	Theory	1	Organizational learning, decision-making processes, and commitment are the aspects that have the greatest impact on organizational behavior	organizational learning - important aspect to strenght an organisation		n	n	Hiring staff, building and renovating physical spaces need to have long-term funding and planning
Manoj, Malvikha; Brough, Richard; Kalbarczyk, Anna	40	Exploring the role and nature of trust in institutional capacity building in low-and middle-income countries: a systematic review	2020	LMICs	n	Journal article / Peer-reviewed	Systematic review	Explore capacity building initiatives and the notion of 'trust' within non-government health institutions in low-and middle-income countries (LMICs) and validate these essential elements of trust through a systematic review	Health	n	Framework	2	Effective leadership and oversight that enhances collaboration, as well as management structures that support institutional culture were identified as key components of effective and empowered leadership for institutions. Empowered leadership was identified as an agent for positive organizational or institutional change, coupled with supportive supervision and a strong managerial vision.	n	Local TIs (trusted institutions) can play a major role in partnership with international organizations, and in conducting competent and ethical research at time of outbreak. Effective collaboration and partnerships were highlighted across several articles, including in searches for funding, in ensuring participatory processes between different stakeholders, and for effective and sustained capacit…	Importance of systems for monitoring and evaluation to assess quality of outputs, highlighting the need for adaptive learning based on a commitment to quality. The need for quality performance indicators to make key judgments and achieve objectives was highlighted as well. Commitment to quality and ethics was also identified as part of the institutional culture and motivation of individuals to le…	A common theme that emerged across articles was the importance of initiatives driven by local needs to promote ownership, i.e., a good fit with local culture and context. This included taking the local staff's experiences into account during the conception and design of projects, as well as aligning research or program evaluation and implementation with national research capacity and needs in lin…	Sustainability, and Good fit with local context. Administrative support and infrastructure were consistently linked to sustainability, and included hiring staff, building and renovating spaces, procuring resources as well as other institutional support structures needed to develop individual and overall capacity. Additional concepts captured by this theme included the need to have sustainable mod…
Marjanovic, Sonja; Hanlin, Rebecca; Diepeveen, Stephanie; Chataway, Joanna	41	Research capacity-building in Africa: Networks, Institutions and Local Ownership	2012	Africa	n	Journal article / Peer-reviewed	Quantitative Descriptive	Provides insights on the challenges that African-led research capacity-building networks can experience as they establish their identity, highlighting the drivers of these challenges and ways they play out in reality. It also identifies potential ways of managing challenges and developing resilience, drawing on evaluation evidence from African capacity-building practitioners. Seeks to shed new li…	n	Regional (Inter-country)	Evaluation	3	African institions are confronted the traditional "north-south" power hierarchies. The described experience had the reputation of African senior consortium leadership. This appears to be important in this regard. Senior researchers have needed to take on new roles and responsibilities, including those not typical of (African) research careers (e.g. involvement in research management capacity-stre…	n	Leadership, programme managers and evaluation officers across the initiative have identified challenges in maintaining regular communications between participants from different partner institutions. According to consortia Directors in the initiative, engaging high-level university authorities in efforts to create sustainable research career pathways has been essential from the very onset of capa…	Drawing on an analysis of risk-management plans from consortia across the initiative, some examples include the following: setting up multiple communication channels (formal and informal); inclusiveness of partners in decision-making processes reflected in governance and management structures and accountability lines; formal collaboration policies, terms of engagement and codes of conduct; entry …	Successfully established early working relationships and strengthened them over time through regular face-to-face and virtual meetings, workshops and discussion spaces. The experiences of consortia leadership suggest that a degree of equitable opportunity in the form of ring-fencing some awards for specific institutions is important for all member organisations to see the benefits of participatio…	Importance of capacity building, the creation and support of human resources adapted to the local context
Mayer, Jeanmarie; Slager, Stacey; Taber, Peter; Visnovsky, Lindsay; Weir, Charlene	58	Forming a successful public health collaborative: A qualitative study	2019	Utah	University of Utah Health	Journal article / Peer-reviewed	Qualitative research	to understand social tensions that may inhibit public health-led community partnerships and to identify factors for success	public health	District	Case study	3	Public health leadership created a safe space by serving as a trusted broker to the collaborative members The leadership of a public health institution helped by reaching out to Collaborative members as a neutral, nonjudgmental partner and trusted broker. Because the health department convened meetings and aggregated data in a nonaccusatory manner, they created a structure for listening to all st…		Group cohesiveness required a shared mental model of stakeholders' mutual dependencies - the importance of share of information and a common understanding of inter-dependency between partners	n	A cross-institutional group identity emerged with high levels of mutual empathy and support Participants from different healthcare roles and systems reported a camaraderie and sense of "groupness" with less finger-pointing and more transparency and empathy. A sense of mutual responsibility was a necessary component of "groupness"and led to coordinated activities and co-responsibility also with …	n
Meda, Nicolas; Dabis, François; Desenclos, Jean-Claude; Crespin, Xavier; Delfraissy, Jean-François	42	Network for strong, national, public health institutes in west Africa	2016	West Africa	n	Journal article / Peer-reviewed	Policy analysis	Introduction of the Global Research Collaboration for Infectious Disease Preparedness (GloPID-R)	n	Regional (Inter-country)	Framework	2	n	Framework for rapid and open data sharing during public health emergencies. This framework will be developed in line with the statement by more than 30 global health bodies on data sharing, and recommendations by the International Committee of Medical Journal Editors.	The collaboration will support that national public health institutes or similar network organisations to fulfill the requirements and will comply with international standards (eg, those formulated by IANPHI) and will thus be well positioned to receive international support, for example in communicable diseases control.	n	n	n
Munteanu, Ioana; Newcomer, Kathryn	81	Leading and Learning through Dynamic Performance Management in Government	2020	n	n	Journal article / Peer-reviewed	Other: Viewpoint essay	This article provides two tools: (1) a more comprehensive open systems performance management framework and (2) a model of leadership needed to orchestrate such systems - knowledge brokers who orchestrate the demand for and supply of evidence	n	n	Framework	2	n	WISE framework: "Wholistic, Integrative, Synergetic, Ecosystem oriented": An open systems framework for knowledge brokerage that can help federal leaders and managers run more efficient operations internally by better aligning leadership goals and operations, empowering employees through providing them with the needed skills and tools, and aligning organizational culture with desired mission-info…	n	n	n	n
Naimoli, Joseph; and Saxena, Sweta	73	Realizing their potential to become learning organizations to foster health system resilience:opportunities and challenges for health ministries in low- and middle-income countries	2018	n	n	Journal article / Peer-reviewed	Other: Literature review	To provide a formative step in encouraging policymakers to reflect upon how they can foster resilience through learning and join researchers in searching for answers to more substantive questions about the dynamics of learning organizations in LMICs, and the relationship between learning and resilience-building.	Health	n	Concepts review	1		Meaning: New ideas are essential for learning to take place; Accompanying changes in the way work gets done: Plausible, a well-grounded definition that is actionable and easy to apply. Management: Ensure learning occurs by design not chance; Explicit policies for learning; explicit guidelines for practice; Operational advice. Systematic problem-solving, relying on the scientific method for diagno…	n	Measurement: Absence of measurement constraints management. Long- and medium-term measurements are necessary but not sufficient. More immediate cognitive and behavioral changes in organizations are often overlooked yet imperative in assessing systemic changes with long gestational periods. Tools are needed for assessing the organization`s rate and level of learning to ensure gains have been made.	n	Building resilient health systems will take time, even in LMICs with mature health systems led by progressive health ministries open to the possibility of mounting, leading, managing, measuring, supporting, and sustaining robust learning programs
Organization for Economic Cooperation and Development (OECD)	67	Building more effective, accountable, and inclusive institutions for all	2014	n	OECD	Gray Literature	n	Reflections on the post-2015 (Millenium Development Goals) agenda. Outlines the importance of effective institutions for sustainable development and examines what steps are being taken to achieve the change required.	n	n	Concepts review	1	n	n	What can international partnerships and organizations like the OECD offer? Knowledge exchange: Knowledge exchange and sharing of good practices can help support public sector reforms. Countries can learn from each other and draw on a network of peers when expertise is needed. The OECD also provides guidelines and recommendations to support institutional reform. Effective development cooperation: …	Introducing regular performance assessments of regulations and regulatory systems, taking into account the impacts on affected parties and how they are perceived, among other things. The results of these assessments should be communicated to the public. Making sure that policies and practices for inspections and enforcement respect the legitimate rights of those subject to the enforcement, are de…	Inclusive institutions level the playing field and provide all citizens with opportunities to participate in and shape public policy (Acemoglu and Robinson, 2012). However, in practice, politics and policymaking can empower some, while marginalizing others. For example, lobbying allows privileged access to decision-making processes for those with greater organizational and financial resources. (N…	n
Organization for Economic Cooperation and Development (OECD)	76	Policy Framework on Sound Public Governance	2020a	n	OECD	Gray Literature	Descriptive Analysis	This Framework provides governments with an integrated baseline diagnostic, guidance, and benchmarking tool to design and implement governance reforms. It reflects a broad consultation process with OECD members, international organizations, civil society organizations, and the public.	n	n	Framework	2	OECD suggests building a values-based culture of public governance. -Strategic planning to translate political commitments and ambitions into strategies and action plans - Strengthening the capacities and skills of public employees, - A well-designed public procurement system, which allows using of procurement as a strategic level of policy objectives, - Measures to promote a culture of integrity…	Skills for developing policy, that combine traditional aptitude with new skills in digital, open and innovative government, - Digital capacities to enable collaboration and enhance transparency. - Strengthening digital government strategies to enable a more strategic use of government data, - Use of data to identify or anticipate societal needs and inform policy design.	n	Public sector integrity is a critical component to preventing corruption, safeguarding democratic institutions, and guaranteeing the rule of law. Openness and transparency policies,as key ingredients to build accountability and trust, which include the accessibility of public information, the proactive disclosure of information and data, and a strategic approach to public communications Accountab…	Inclusiveness, participation, gender equality, and diversity contribute to the quality of democracy and help empower marginalized, disadvantaged, and/or vulnerable groups. -Governments can develop conflict-of-interest management frameworks as well as guarantee effective regulations and practices for integrity and transparency in lobbying activities and in the financing of political parties and el…	n
Organization for Economic Cooperation and Development (OECD)	85	Building Capacity for Evidence-Informed Policy-Making Lessons from country experiences	2020b	n	n	Gray Literature	Other: report	The report focuses on the skills and capacities governments need to strengthen evidence-informed policymaking, including issues of staff capability, in terms of psychological and physical capacity, knowledge and skills, motivation and opportunity in terms of the external factors that prompt an individual to make use of evidence.	n	n	Evaluation - case description	3	Strategic leadership is critical to drive organisational change necessary for improved evidence-informed policy-making.	There is a need to address the elusive connections between evidence and policy-making, while acknowledging the importance of cognitive constraints and bias. This highlights the rationale for focusing on the demand of evidence, at the level of individual skills, as well as at the structural and organisational levels. Capacity-building should consider local political and institutional contexts for …	Joint Research Centre’s (JRC) longstanding experience of working at the intersection of science and policy. The JRC has developed a Framework for Skills for Evidence-informed policy-making, mapping the essential for researchers active in the sciencepolicy interface. The European Commission has also developed a “Toolbox for a quality public administration” which aims to support, guide and encourag…		n	n
Pelling, Mark; High, Chris; Dearing, John; Smith, Denis	52	Shadow spaces for social learning: a relational understanding of adaptive capacity to climate change within organisations	2008	United Kindom	n	Journal article / Peer-reviewed	n	Providing space within and between local organisations for individuals to develop private as well as officially sanctioned social relationships is supported as a pathway to enable social learning. It is also a resource for adaptation that requires little financial investment but does call for a rethinking of the personal skills and working routines that are incentivised within organisations	n	n	Framework	2	Six adaptive pathways: 1. Organisational internal action: The organisation takes collective action within its environment in order to facilitate adaptation to environmental changes.The organisation changes its management structure or practice. 2. Organisational external action: The organisation takes collective action to modify its relationship with the external environment, or an element of the …	n	n	n	n	n
Portes, Alejandro; and Smith, Lori	10	Institutions and national development in Latin America: a comparative study	2010	Latin America (Argentina, Chile, Colombia, Mexico and the Dominican Republic)	Princeton Institute for International and Regional Research and grant 0647030 from the National Science Foundation	Journal article / Peer-reviewed	Cross sectional study	To see whether differences existed between a sample of countries that commonly receive comparable scores in cross-national indices of institutional quality.	Stock exchanges, Tax Authorities, Public Health, Postal Systems, Civil Aviation Authorities	n	Case study - 1 (comparative analysis)	3	Determinants: Meritocracy, Immunity to corruption, no "islands of power", proactivity, technological flexibility, external allies. Meritocracy. Results support the conclusion that hiring and promotion in the (Dominican Republic) health service are at the discretion of the authorities and are poorly meritocratic. Probity. This feature is predominantly absent and the system is vulnerable to the pre…	Technological flexibility as one determinant of institutional development	Countervailing power, either by the organization itself or its external allies, to prevent control by particularistic interests in the dominant classes	n	n	n
Radin, Andrew	9	Institution Building in Weak States - The Primacy of Local Politics	2020	Kosovo, Iraq, Bosnia, Timor-Leste, Ukraine	RAND Corporation, Santa Monica, California, USA	Gray Literature	Quantitative Descriptive	To study foreign-supported institution building	Defence sector	National	Case study	3	n	n	"Foreign institution builders achieve the greatest success when they propose changes that do not provoke domestic opposition, and that they can do so by avoiding threatening two core domestic interests´nationalist goals, such as achieving independence or ethnic autonomy, and the ruling elites´patron-client networks" Steps of institutional reform (supported by an international organization) 1) For…	n	n	n
Rao, T.V. and Khandelwal, Anil K.	60	Human Resources Development, Organisation Development, and Institution Building, Essays in Memory of Udai Pareek	2016	India	n	Gray Literature	n	n	n	n	Concepts review	1	Human Resources (HR) leaders as change enablers: importance of stronger communication and the feeling of being appreciated, togetherness with the organization. The implementation has proven to be effective over the last year and has most importantly demonstrated that people can coexist in multiple layers (physical well-being, communication, emotional well-being, intellectual well-being, and spiri…	n	n	Another key observation is that people trust each other a lot in such institutions. There is always an element of informality, and colleagues can get a lot of things done over phone or across table, all based on mutual trust. You can always follow up many things through an email confirmation, but action is not delayed for want of an email or formal communication. Trust will grow only if it is pra…	n	n
Reinold, Theresa	68	Human Rights Protection in IMF Lending: Organizational Inertia and the Limits of Like-Minded Institution-Building	2017	n	n	Gray Literature	n	To trace the evolution of the Fund's thinking on 'social issues' (human rights in IMF parlance) and attributes this evolution to the concerted efforts of a group of like-minded actors - from non-governmental organizations (NGOs) including Oxfam, Eurodad, and others who were prodding the IFIs to take into account the human rights impact of their policies, to IMF member states such as the United Ki…	PublicAdministration	Regional (Inter-country)	Concepts review	1	n	n	Like-minded Institution-building: Push Factors: A Coalition of Like-minded Actors: The influence of civil society on the Fund is, for instance, visible in its information disclosure policy, in the requirements for civil society organizations (CSOs) consultation as part of the Poverty Reduction Strategy Papers (PRSPs) process and finally, albeit to a more limited extent, in its approach to Poverty…	n	n	n
Romanelli, Mauro	82	Rethinking Public Organizations as Knowledge-Oriented and Technology-Driven Organizations	2017	n	University of Naples Parthenope, Napoli, Italy	Journal article / Peer-reviewed	Essay	To elucidate how technology enabling and sustaining openness, participation and co-production of public services is driving public organizations to rediscover the importance of knowledge as a source for creating public value and develop a knowledge management approach and culture in order to design and implement democratic and participatory processes supported by the use and the adoption of techn…	Public sector	n	Framework	2	n	"Technology helps drive and supports public sector management reform for change and innovation; ...technology helps redesign and implement public management reform for driving change and enables public organizations to proceed towards sustainable development over time". Public organizations should use new technology to rediscover a "knowledge-based approach", considering 1) promoting openness bet…	n	The use of new technologies supports auditing and transparency processes, increasing the trust of citizens and their engagement.	The use of new technologies contribute to enhancing the participation and empowerment of civil society, increasing the co-production of public services (better efficiency, quality and sustainability of public services)	n
Rosenfeld, Emily; Binder, Sue; Brush, C. Adam; Whitney, Ellen A. Spotts; Jarvis, Dennis; Seib, Katherine; Verani, AndréR.; Flores, Michael A.; and Menon, Akshara Narayan	43	National Public Health Institute Legal Framework: A Tool to Build Public Health Capacity	2020	5 countries in Africa - Ethiopia, Guine-Bissau, Liberia, Mozambique, Nigeria	US Centers for Disease Control and Prevention; and International Association of Public Health Institutes, Global Health Institute, Emory University	Journal article / Peer-reviewed	Descriptive Analysis	Identify and further refine legal domains of existing public health laws related to National Public Health Institutes	Health Sector - National Public Health Institutes	National	Framework	2	All 5 NPHIs are authorized as parastatal entities, although the definition of parastatal and the implications foroversight and use of ministry systems (eg, for hiring and finances) vary across countries. Descrption of the different laws framaing autonomy of NPHI, different grades of oversight by Ministries of Health, and profiles and functions of NPHI directors among countries.	n	n	Accountability and Reporting: Laws for Mozambique, Ethiopia, Guinea-Bissau, Liberia, and Nigeria codify relationships between the NPHI and the ministry of health or other government entities. The reporting mechanisms reviewe lay out additional requirements for accountability and reporting under the law. While all 5 countries require annual reporting, they vary on the content required to be report…	n	n
Ruseva, Maria; Chichevalieva, Snezhana; Harris, Meggan; Kostova, Neda Milevska; Jakubowski, Elke; Kluge, Hans; and Martin-Moreno, Jose M	53	The South Eastern Europe Health Network: A model for regional collaboration in public health	2015	South eastern europe	South Eastern Europe Health Network (SEEHN), Skopje, Republic of Macedonia; WHO Country Office in the Former Yugoslav Republic of Macedonia, Skopje, Republic of Macedonia; Department of Preventive Medicine and Public Health, University of Valencia, Spain; Centre for Regional Policy Research and Cooperation ―Studiorum‖, Skopje, Republic of Macedonia; Division of Health Systems and Public Health, W…	Journal article / Peer-reviewed	Review article	To follows the main milestones of the SEEHN operation network development, including its foundation under the Stability Pact's Initiative for Social Cohesion and the three ministerial forums that have shaped its evolution, in order to show how it can constitute a model for regional collaboration in public health.	South Eastern Europe Health Network (SEEHN)	Regional (Inter-country)	Guideline	2	important factor for success: commitment to accomplish both political and technical objectives	Regional learning, global lessons - collaborative learning approach	Learning by doing: Forging partnerships in public health to protect the most vulnerable populations - international network supported the creation/strengthening of public health in the south east Europe: As for implementation, regional project offices were established in the lead country for each technical area. Since then, these offices have managed and coordinated technical work at a regional l…	n	n	For sustainability - "from elitism to populism, from centralism to decentralization, from isolated professionalism to dialogue and from percolation to growth”
Salkic, Ismet	54	Impact of Strategic Planning on Management of Public Organization in Bosnia and Herzegovina	2014	Bosnia and Herzegovina	Faculty of Political Science - University of Sarajevo	Journal article / Peer-reviewed	Cross sectional study	To determine and analyse the effects of strategic planning on the management of public organizations	Public sector	National	Evaluation	3	Strategic planning is a key aspect for improving the performance of an organization. It focuses the attention on challenges and key issues, helping stakeholders to make decisions related to them. The study analyses three areas, including leadership/governance/team building areas of 1) "function of institutional planning" (governance and general leadership aspects), 2) "development team optimizati…	n	n	n	n	n
Savedoff, William D.	77	Governance in the Health Sector - A Strategy for Measuring Determinants and Performance	2011	n	World Bank	Gray Literature	Policy/Descriptive analysis	To draw on existing work from the health sector and broader governance literature to advance the discussion by providing a framework that should be both analytically and operationally useful. Such a framework will also make it possible to assess the usefulness of different measures of governance and to identify promising alternatives.	Health sector	n	Framework	2	"Improvements in a governance mechanism can be both cause and consequence (i.e. reverse causality), the result of other changes that simultaneously improve country performance, or necessary but not sufficient conditions for improving country performance." Three lessons from the literature: 1) governance can be measured, 2) these measures can be useful for advocacy and analysis 3) misuse and misin…	n	n	n	n	n
Song, Younhyun	64	The Leadership Effectiveness in the Process of PlannedOrganizational Change	2009	South Korea	Rockefeller College of Public Affairs and Policy, State University of New York at Albany,	Journal article / Peer-reviewed	Quantitative descriptive (Descriptive Analysis)	To examine "the extent to which planned organizational change intervention (team-building system) affects organizational behaviour"	Public Administration	National	Evaluation	3	Adoption of a team-based management system and of team-building strategies as a planned organizational change to improve public sector performance. Change of a reporting system of five to three reporting/supervision layers; team members with the same rank; increased responsibility of team leaders. Changing of a hierarchical (office-bureau division) to a more horizontal structure (headquarters-tea…	n	n	n	n	Contextual barriers: structural inertia, high rotation of personal (no time to be accustomed with organizational changes). Structural changes should consider the contextual situations and follow contextual changes. The researchers suggest the necessity of contextual studies of planned organizational change.
Strielkowski, Wadim; Volchik, Vyacheslav; Maskaev, Artyom; and Savko, Pavel	80	Leadership and Effective Institutional Economics Design in the Context of Education Reforms	2020	Russia	Department of Trade and Finance, Faculty of Economics and Management, Czech University of Life SciencesPrague; and Department of Economic Theory, Faculty of Economics, Southern Federal University, Russia	Journal article / Peer-reviewed	Mixed methods study	To "study the mechanisms of reorganization of universities and propose principles for designing effective institutions for the sustainable development of reorganized universities"	Education sector	n	Framework	2	n	n	n	n	n	The sustainable development of leading universities needs focus and well-balanced economic, and institutional design. Principals of design: preservation of education as a mixed good (public and private good); transparency on the decision making; complementary of institutional change, and reduction in transaction costs.
Taytak, Mustafa; and Aydin, Murat	55	Efficiency in InternalAuditing: A Study of Turkish Public Administration	2019	Turkey	Uşak University	Journal article / Peer-reviewed	Survey	"How can an effective internal audit be established?" based on the perceptions of public officials	Public Administration	n	Framework	2	n	n	n	The internal auditing process should be integrated within "the institution for increasing the quality of service so that the institution becomes more functional and has an internal audit culture which operates for common purposes"	n	n
Treviño, Len J.	69	Institutional theory and institution building in emerging economies	2016	n	n	Gray Literature	n	n	n	n	Concepts review	1	n	n	Despite the need for private investment, institutional uncertainty and missing markets in emerging economies can make firms think twice about investing in infrastructure in those settings. The development of incentives in emerging markets, including the provision of tax incentives, tax holidays, and direct financing, can offset uncertainty and promote private investment in infrastructure. This li…	Corruption:since state-owned enterprises in emerging economies have often operated inefficiently, due to a lack of efficient capital market institutions and a dearth of entrepreneurial and managerial skills, a common privatization strategy in developing countries, and one emphasized by many governments, is the sale of state-owned enterprises to the private sector. If such sales occur in a transpa…	n	n
Verrecchia, Robert; Dar, Osman; Mohamed-Ahmed, Olaa; and Squires, Neil	74	Building operational public health capacity through collaborative networks of National Public Health Institutes	2019	n	Global Public Health Division, Public Health England and The Centre on Global Health Security, Chatham House, Royal Institute of International Affairs, London, UK	Journal article / Peer-reviewed	Policy analysis	To outline the role of NPHIs, analyse their advantages and shortcomings, and explore their potential to deliver enhanced public health through collaborative networking as well as the partnership with WHO	Health Sector - National Public Health Institutes	Regional (Inter-country)	Theory	1	n	n	International networking and partnership, structured peer-to-peer support. An NPHIs network (e.g. IANPHI) facilitate operational capability being developed, transferred and owned at the national level. Peer learning has been gaining increased attention in recent years. As a model of development, it presents a flexible alternative to traditional methods, with a shared approach that enables the tra…	n	n	n
World Bank	78	Corporate Governance of State-Owned Enterprises	2014	n	World Bank Group	Gray Literature	Descriptive Analysis	This toolkit provides an overarching framework for the corporate governance of state-owned enterprises (SOEs), along with the tools and information for making practical improvements	n	n	Framework	2	Countries willing to develop state-owned enterprised code might consider these basic steps: - Reach agreement within the government on the need for and purpose of the code and the desired outcomes. High-level support for developing and implementing a code is useful. - Take time early on to consider the purpose of the code and develop an implementation plan. - Commitment from leaders (administrati…	n	n	Developing the capacity of SOE owners and regulators to monitor and evaluate compliance and elevating their role and profile in promoting compliance. Including compliance with the code as a critical part of the performance-monitoring and disclosure systems. Obtaining baseline information, to create the necessary building blocks for developing a performance-monitoring system. Setting mandates, str…	n	n
World Bank Group and Govenrment of Rwanda	44	Capable and Accountable State Institutions - Chapter 6 In: Future Drivers of Growth in Rwanda. Innovation, Integration, Agglomeration, and Competition	2020	Rwanda	World Bank and Government of Rwanda	Gray Literature	n	How should Rwanda strengthen its state efficiency and accountability to best support successful transition to becoming a modern, competitive, and globally connected middle-income economy?	n	National	Concepts review	1	Strategy to improve administration and governance with the use of imihigo, a Rwandan management tool of accountability: Imihigo is the plural in Kinyarwanda of umuhigo, which means a "vow to deliver". Enabling innovative, coordinated, capable bureaucracy and local governments: To enhance innovation, Rwanda could consider adopting multiyear targets in imihigo with annual benchmarks, making greater…	A key challenge is the issue of weak innovation among bureaucrats and local governments. The identification and encouragement of local innovations in the current imihigo evaluation framework are good examples to emulate in order to mitigate the possible negative effects of centralized evaluation and control. Strong performance monitoring can also create a culture of internal competition or a "hyp…	Coordination between ministries and public sector agencies is still a challenge . With the development of several semiautonomous agencies, some institutions (and staff) may have competing mandates, which increases the coordination costs for businesses and citizens .An example may be the Rwanda Revenue Authority (RRA), which is mandated to collect tax revenues, and the Rwanda Development Board, wh…	Enhancing the State´s Accountability to Citizens: Deepening the initiatives that have sought to involve citizens in local decision making (for example, in setting imihigo objectives) and to provide greater local flexibility and reliance on more qualitative information in monitoring performance would strengthen support for local government and improve the quality of services. A key challenge is th…	Deepening initiatives that have sought to involve citizens strengthen support for local government and improve the quality of services.	n
Zaato, Joshua Jebuntie and Frank L.K. Ohemeng	45	Building Resilient Organizations for Effective Service Delivery in Developing Countries: The Experience of Ghana WaterCompany Limited	2015	Ghana	School of Political Studies, University of Ottawa, Ottawa, Ontario, Canada	Journal article / Peer-reviewed	Qualitative research	To understand the process which the government is using to rebuild the new organization of the (water) sector and whether what it is doing will lead to the building of a resilient organization that will be able to withstand all the turbulence in the sector	water sector	National	Framework	2	Build an autonomous organization (prevent political interference in day-to-day activities); appointment of a board of directors; effective leadership at all levels of the organization (good implementation of strategic plans); build a sense of belonging among the team (organisational culture);	Training management and technical workforce; acquisition of necessary equipment	n	Develop an effective performance management system	n	n
